# Supplementary material for: Influence of Single-Nucleotide Polymorphisms in PPAR-δ, PPAR-γ, and PRKAA2 on the Changes in Anthropometric Indices and Blood Measurements through Exercise-Centered Lifestyle Intervention in Japanese Middle-Aged Men
Source: PubMed Central journal article supplement (PMC5877564; doi:10.3390/ijms19030703), 2018-03-01
Supplement: ijms-19-00703-s001.pdf [file ijms-19-00703-s001.pdf]

**Supplementary Table S1.** Post-intervention values of anthropometric/biochemical parameters measured at second checkup according to genotypes of PPAR- $\delta$ , PPAR- $\gamma$ , and PRKAA2 SNPs.

| Variables                | All subjects ( <i>n</i> = 109) |   |             | PPAR- $\delta$ rs2267668 |   |                            |      |                      |             | PPAR- $\gamma$ rs1801282   |   |                      |      | PRKAA2 rs1418442           |             |       |   |             |      |   |             |
|--------------------------|--------------------------------|---|-------------|--------------------------|---|----------------------------|------|----------------------|-------------|----------------------------|---|----------------------|------|----------------------------|-------------|-------|---|-------------|------|---|-------------|
|                          |                                |   |             | A/A ( <i>n</i> = 66)     |   | A/G + G/G ( <i>n</i> = 43) |      | C/C ( <i>n</i> = 99) |             | C/G + G/G ( <i>n</i> = 10) |   | A/A ( <i>n</i> = 64) |      | A/G + G/G ( <i>n</i> = 45) |             |       |   |             |      |   |             |
| Weight (kg)              | 74.3                           | ± | 0.8         | 75.9                     | ± | 1.1                        | 71.8 | ±                    | 1.2         | 73.7                       | ± | 0.8                  | 79.9 | ±                          | 3.7         | 74.4  | ± | 1.0         | 74.1 | ± | 1.3         |
| BMI (kg/m <sup>2</sup> ) | 25.3                           | ± | 0.2         | 25.7                     | ± | 0.3                        | 24.7 | ±                    | 0.4         | 25.1                       | ± | 0.2                  | 27.5 | ±                          | 0.9         | 25.4  | ± | 0.3         | 25.3 | ± | 0.3         |
| Waist circumference (cm) | 88.8                           | ± | 0.6         | 89.7                     | ± | 0.8                        | 87.4 | ±                    | 0.9         | 88.3                       | ± | 0.6                  | 93.1 | ±                          | 2.8         | 89.1  | ± | 0.9         | 88.3 | ± | 0.9         |
| SBP (mmHg)               | 127                            | ± | 1           | 129                      | ± | 2                          | 123  | ±                    | 2           | 127                        | ± | 1                    | 127  | ±                          | 4           | 127   | ± | 2           | 127  | ± | 2           |
| DBP (mmHg)               | 82                             | ± | 1           | 84                       | ± | 1                          | 80   | ±                    | 2           | 82                         | ± | 1                    | 81   | ±                          | 3           | 82    | ± | 1           | 82   | ± | 1           |
| Glucose (mg/dL)          | 99.5                           | ± | 1.2         | 100.3                    | ± | 1.6                        | 98.4 | ±                    | 1.5         | 99.7                       | ± | 1.2                  | 97.3 | ±                          | 2.4         | 100.6 | ± | 1.6         | 97.9 | ± | 1.6         |
| HbA <sub>1c</sub> (%)    | 5.45                           | ± | 0.05        | 5.48                     | ± | 0.07                       | 5.39 | ±                    | 0.04        | 5.45                       | ± | 0.05                 | 5.37 | ±                          | 0.11        | 5.50  | ± | 0.07        | 5.37 | ± | 0.04        |
| TG (mg/dL)               | 112                            |   | (86–150)    | 120                      |   | (99–168)                   | 94   |                      | (72–136)    | 111                        |   | (86–150)             | 128  |                            | (98–154)    | 115   |   | (86–151)    | 109  |   | (87–150)    |
| AST (IU/L)               | 22.0                           |   | (19.0–25.0) | 22.0                     |   | (19.0–26.0)                | 22.0 |                      | (18.0–24.0) | 22.0                       |   | (18.5–24.5)          | 25.5 |                            | (22.0–27.8) | 22.0  |   | (19.0–24.3) | 22.0 |   | (19.0–26.0) |
| ALT (IU/L)               | 24.0                           |   | (19.0–33.0) | 25.0                     |   | (20.0–35.0)                | 23.0 |                      | (17.5–31.0) | 24.0                       |   | (19.0–32.0)          | 33.5 |                            | (20.3–38.0) | 23.5  |   | (19.0–34.0) | 25.0 |   | (19.0–31.0) |
| $\gamma$ -GTP (IU/L)     | 36.9                           |   | (25.6–54.5) | 38.8                     |   | (27.2–56.4)                | 35.2 |                      | (24.1–52.1) | 36.9                       |   | (25.8–53.8)          | 39.6 |                            | (23.8–62.9) | 36.2  |   | (25.9–57.3) | 37.2 |   | (23.9–53.6) |
| HDL-C (mg/dL)            | 52                             | ± | 1           | 50                       | ± | 2                          | 54   | ±                    | 2           | 52                         | ± | 1                    | 47   | ±                          | 2           | 51    | ± | 1           | 52   | ± | 2           |
| LDL-C (mg/dL)            | 129                            | ± | 3           | 128                      | ± | 4                          | 130  | ±                    | 4           | 128                        | ± | 3                    | 143  | ±                          | 8           | 125   | ± | 4           | 135  | ± | 4           |
| Total-C (mg/dL)          | 206                            | ± | 3           | 206                      | ± | 4                          | 207  | ±                    | 4           | 205                        | ± | 3                    | 218  | ±                          | 10          | 202   | ± | 4           | 213  | ± | 4           |

Values are the mean ± SE or the median (interquartile range). PPAR, peroxisome proliferator-activated receptor; PRKAA2,  $\alpha$ 2 isoform of catalytic subunit of AMP-activated protein kinase; SNP, single-nucleotide polymorphism; BMI, body mass index; SBP, systolic blood pressure; DBP, diastolic blood pressure; HbA<sub>1c</sub>, hemoglobin A<sub>1c</sub>; TG, triglyceride; AST, aspartate aminotransferase; ALT, alanine aminotransferase; GTP, glutamyl-transpeptidase, HDL-C, high density lipoprotein cholesterol; LDL-C, low density lipoprotein cholesterol; Total-C, total cholesterol.
